# Supplementary material for: Pteropine Orthoreovirus in an Angolan Soft-Furred Fruit Bat (Lissonycteris angolensis) in Uganda Dramatically Expands the Global Distribution of an Emerging Bat-Borne Respiratory Virus
Source: MDPI journal article supplement (doi:10.3390/v12070740), 2020-07-09

**Supplemental Figure 1:**  
**Ka/Ks annotated tree of cell-attachment protein ORF of Pteropine orthoreovirus Segment 1**

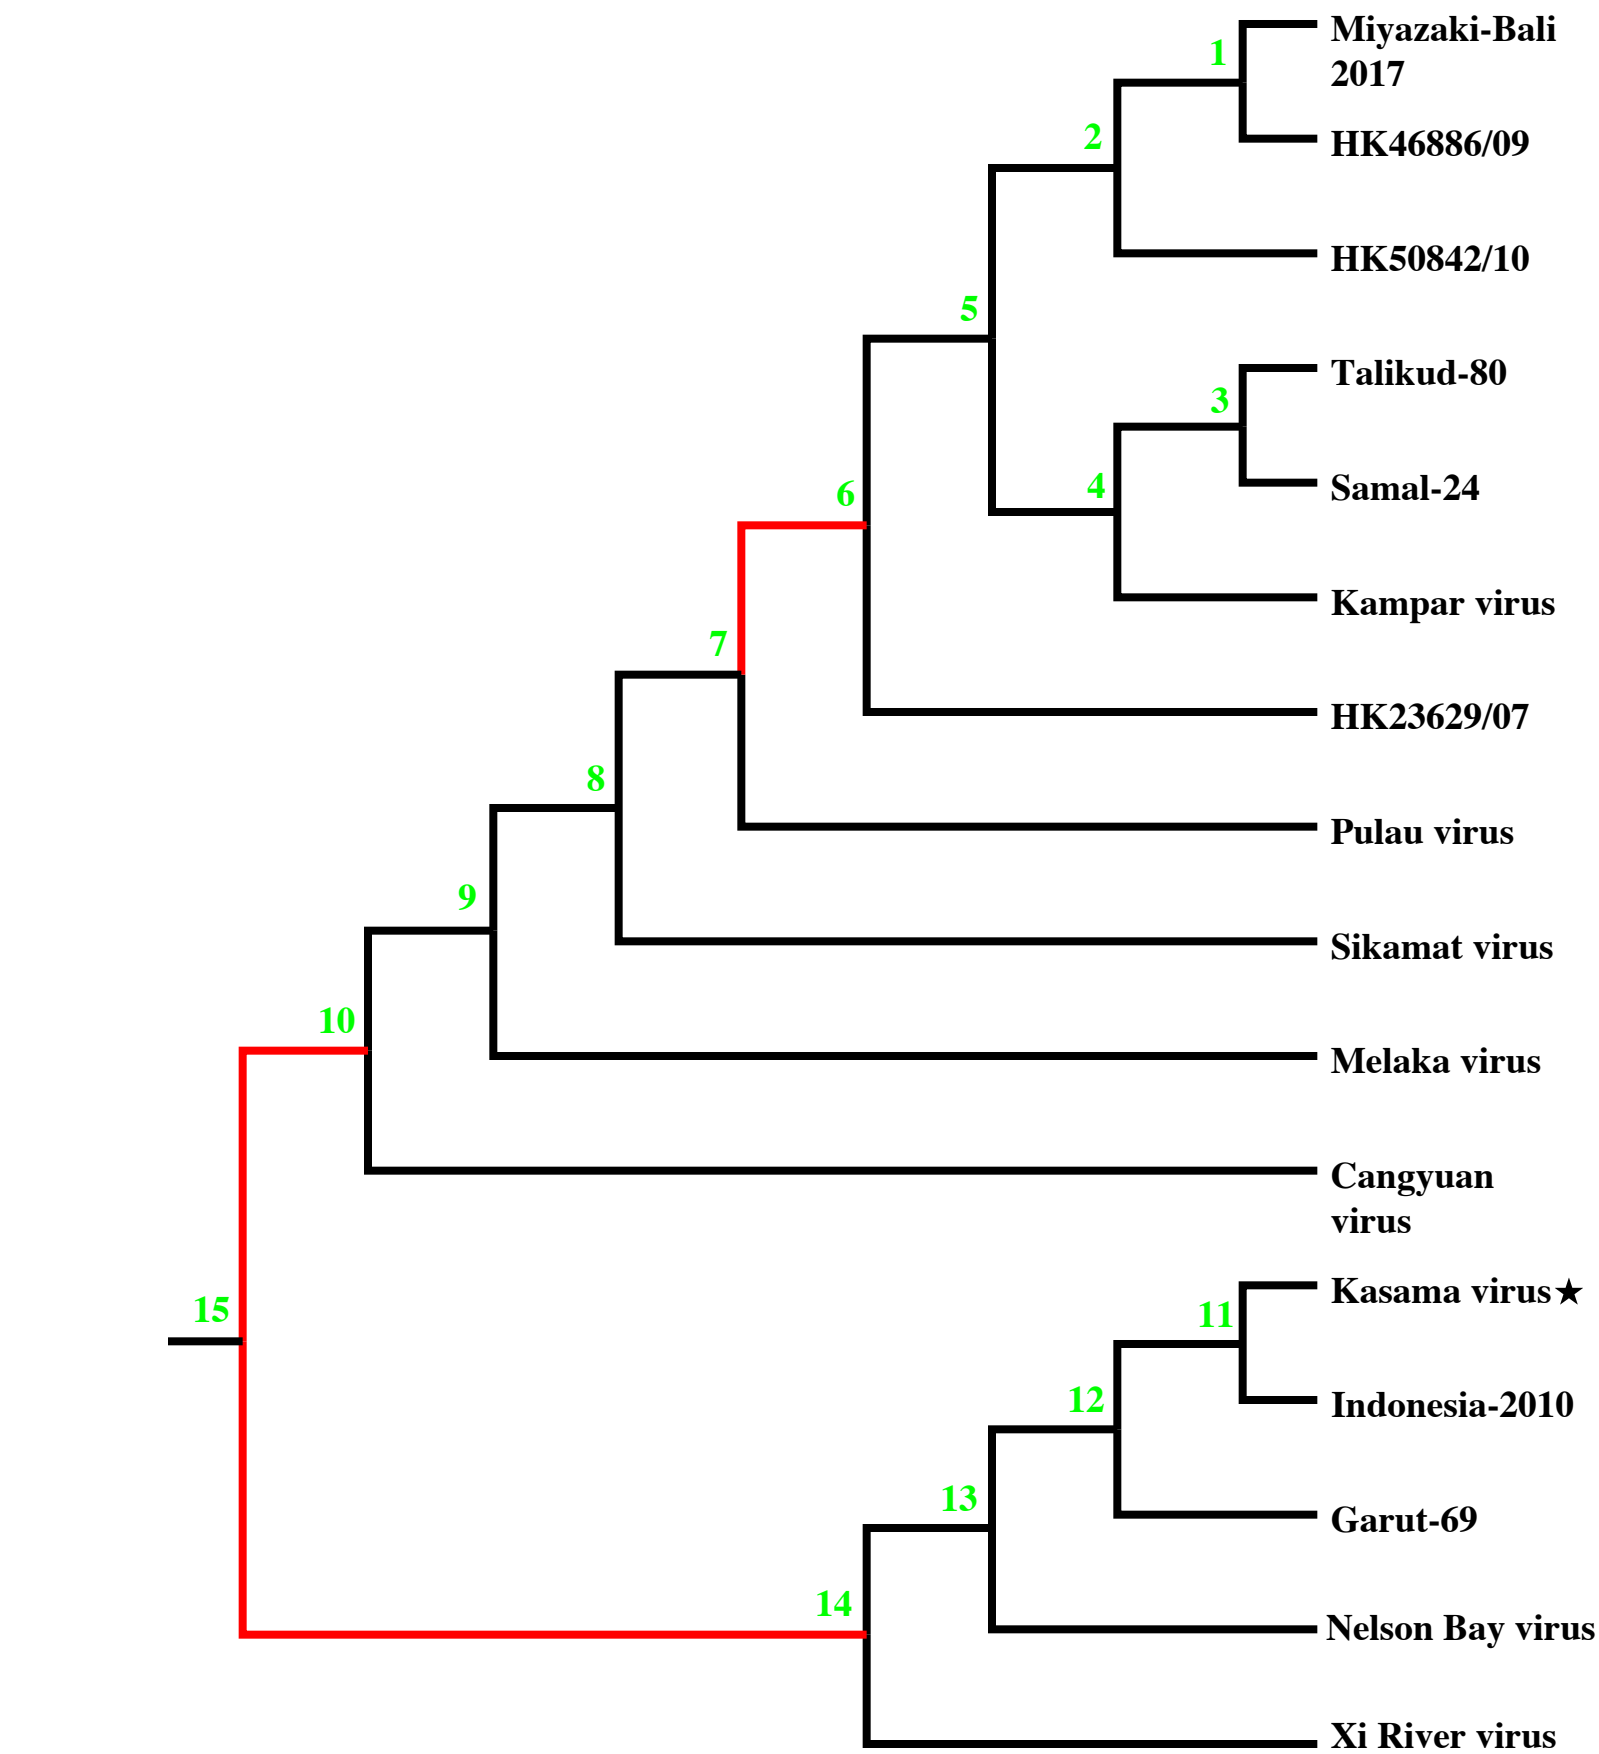

Supplement: s1 [file s1]
